# Supplementary material
Source: Springer Nature journal article supplement (https://www.springermedizin.de/resource/supplementary/12958_2010_750_MOESM1_ESM.pdf/9568400)

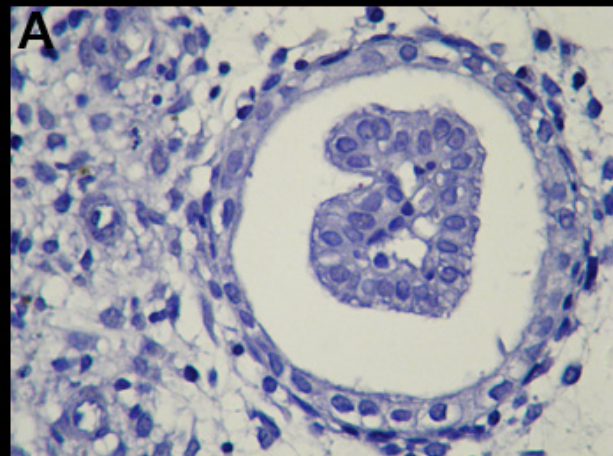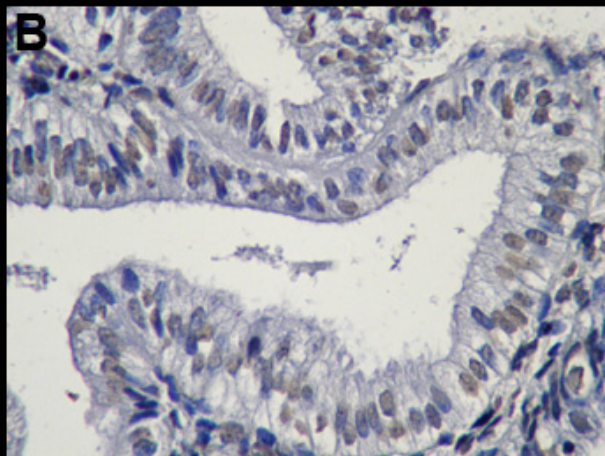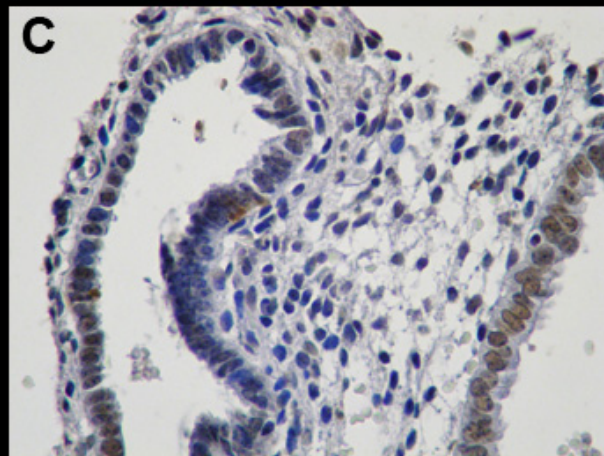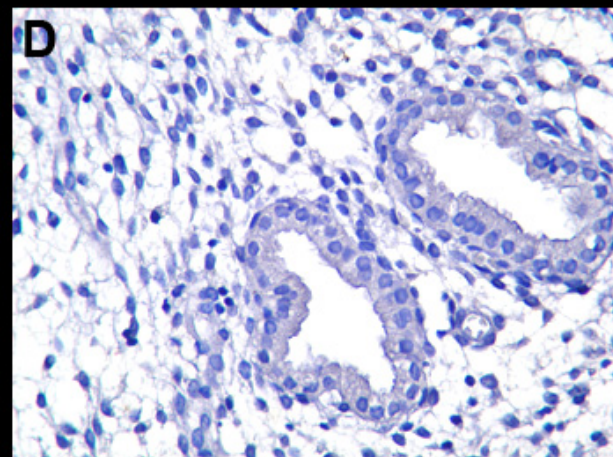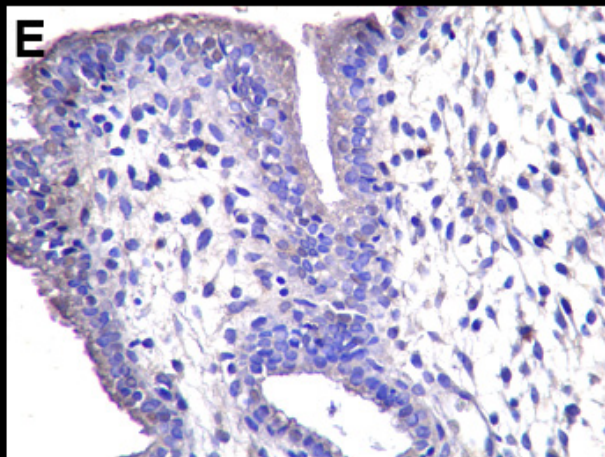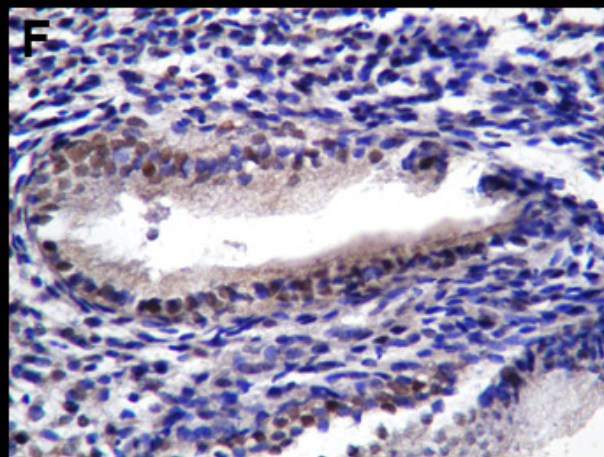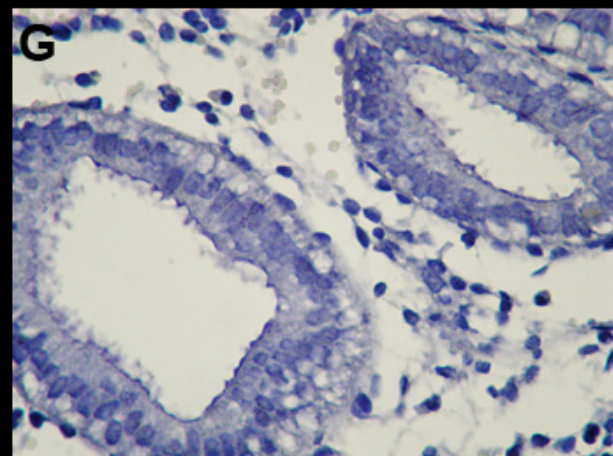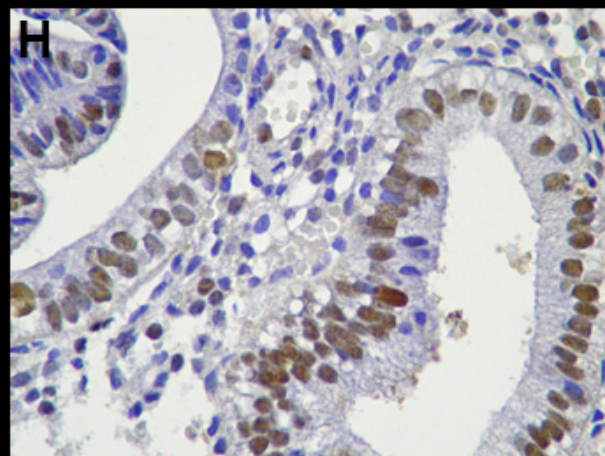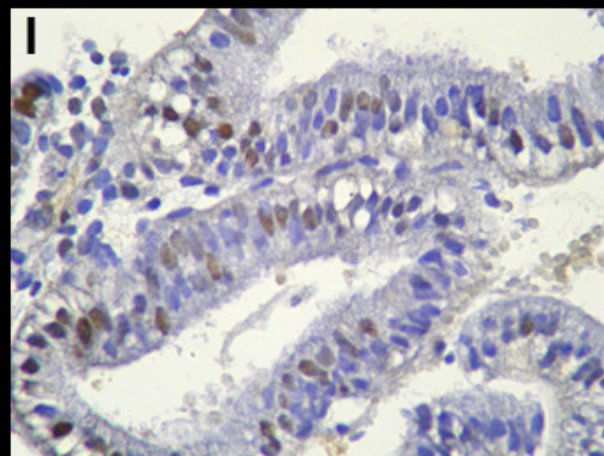

Supplement: MOESM1 [file 9568400]
